# Supplementary material for: Study on the interaction of berberine with nucleic acids in the presence of silver nanoparticles, and the fluorometric determination of nucleic acids
Source: Royal Society of Chemistry journal article supplement (doi:10.1039/c6ra02346k), 2016-01-01
Supplement: c6ra02346k1.pdf [file c6ra02346k1.pdf]

Supporting information

**Study on the interaction of berberine with nucleic acid in presence of silver nanoparticles and the fluorometric determination of nucleic acids**

Yanyan Zhao,<sup>a</sup> Haiping Zhou,<sup>a</sup> Jin Shen,<sup>a</sup> Minqin Wang<sup>b</sup> and Xia Wu<sup>\*a</sup>

*<sup>a</sup>Key Laboratory of Colloid and Interface Chemistry (Shandong University), Ministry of Education, School of Chemistry and Chemical Engineering, Shandong University, Jinan 250100, P. R. China.*

*<sup>b</sup>College of Life Science Shandong University, Jinan 250100, P. R. China.*

*\*Corresponding author. E-mail: [wux@sdu.edu.cn](mailto:wux@sdu.edu.cn) (X. WU); Fax: +86 53188564464; Tel: +86 53188365459.*

### Effect of pH and the Choice of Buffer Solution

The effect of solution pH on the fluorescence intensity of the system is shown in Fig. S1. It can be seen that  $\Delta I$  value reaches the maximum and remains constant in the pH range of 6.7-7.1, so pH 7.0 is used for subsequent work. Experimental results indicated that different kinds of buffers had diverse effects on the  $\Delta I$  of the system. The  $\Delta I$  for H<sub>2</sub>O, barbital sodium-HCl, hexamethylenetetramine-HCl, potassium hydrogen phthalate-NaOH and citric acid-K<sub>2</sub>HPO<sub>4</sub> and Britton-Robinson were 93.3, 61.6, 70.0, 39.7, 35.0 and 74.1, respectively. The results indicated that H<sub>2</sub>O was the most suitable medium.

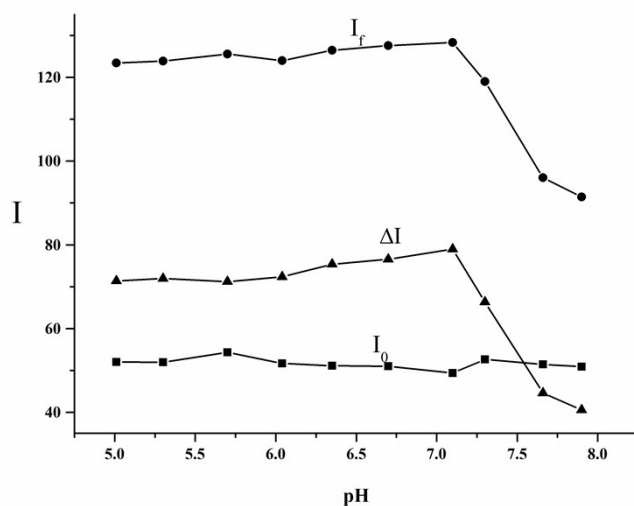

Fig. S1 Effect of pH. Conditions: AgNPs:  $3.2 \times 10^{-7}$  g mL<sup>-1</sup>; BER:  $8.0 \times 10^{-6}$  mol L<sup>-1</sup>; ctDNA:  $1.0 \times 10^{-6}$  g mL<sup>-1</sup>.

### Effect of AgNPs concentration

The influence of AgNPs concentration on the fluorescence intensity of the system is shown in Fig. S2. It can be seen in Fig. S2 that  $\Delta I$  of the system remains the maximum and basically constant when the concentration of AgNPs is above  $1.6 \times 10^{-7}$  g mL<sup>-1</sup>. In this paper,  $3.2 \times 10^{-7}$  g mL<sup>-1</sup> AgNPs is chosen for further experiment.

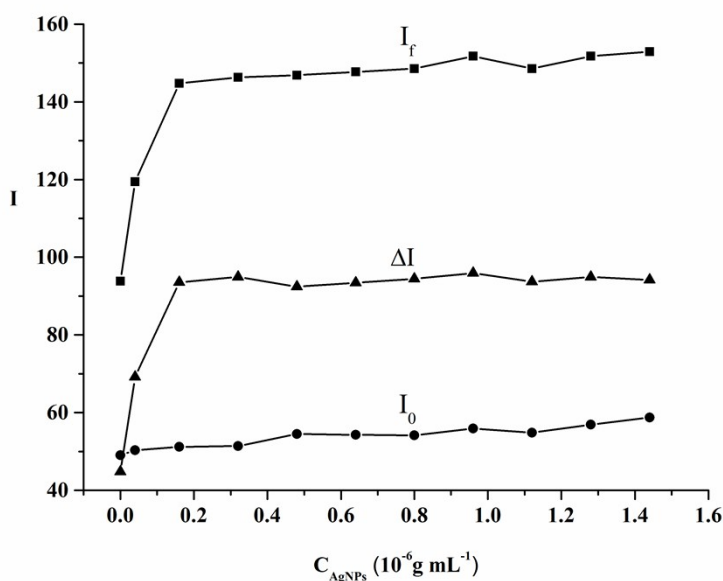

Fig. S2 Effect of AgNPs. Conditions: BER:  $8.0 \times 10^{-6}$  mol L<sup>-1</sup>; ctDNA:  $1.0 \times 10^{-6}$  g mL<sup>-1</sup>.

### Effect of BER concentration

Figure S3 shows the effect of the BER concentration on the fluorescence intensities of the systems. With the increasing of BER concentration, the fluorescence intensities of ctDNA and AgNPs-ctDNA were gradually enhanced. Whereas,  $\Delta I$  value of the AgNPs-ctDNA-BER system reached a maximum when the concentration of BER was  $8.0 \times 10^{-6} \text{ mol L}^{-1}$ , so it was chosen for the further experiment.

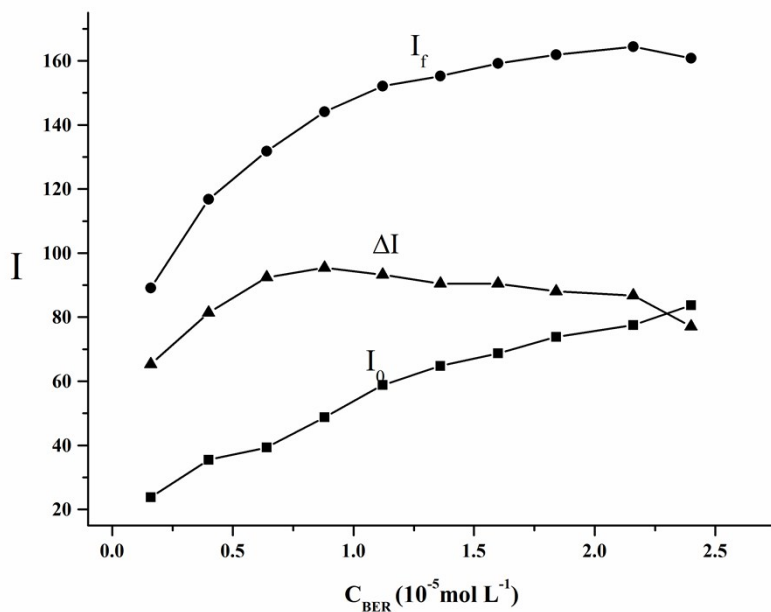

Fig. S3 Effect of BER. Conditions: AgNPs:  $3.2 \times 10^{-7} \text{ g mL}^{-1}$ ; ctDNA:  $1.0 \times 10^{-6} \text{ g mL}^{-1}$ .

### Calibration graphs

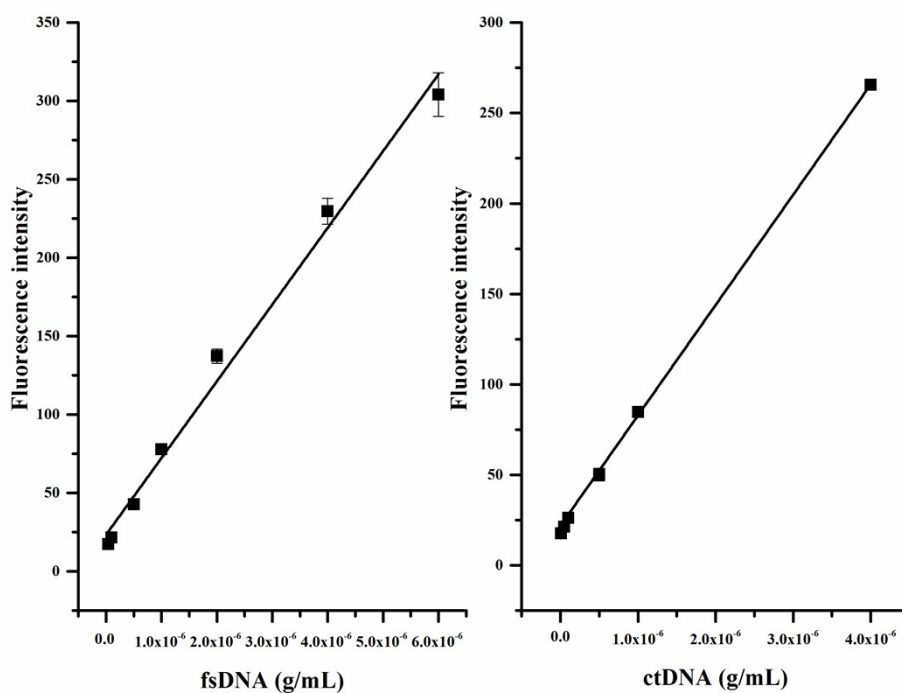

Fig. S4 Calibration curves. Conditions: BER:  $8.0 \times 10^{-6} \text{ mol L}^{-1}$ ; AgNPs:  $3.2 \times 10^{-7} \text{ g mL}^{-1}$ .

## The fluorescence lifetime decay curves

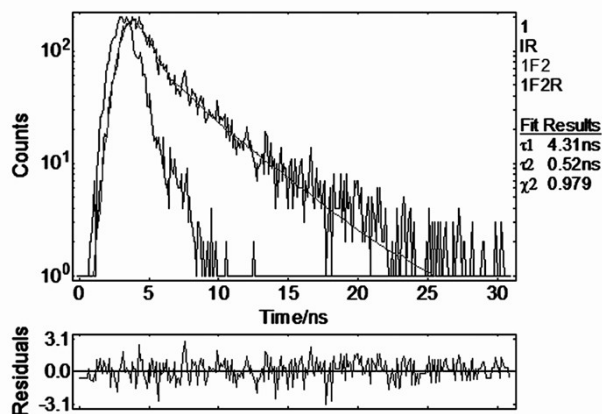

(a) The fluorescence lifetime decay curve of BER

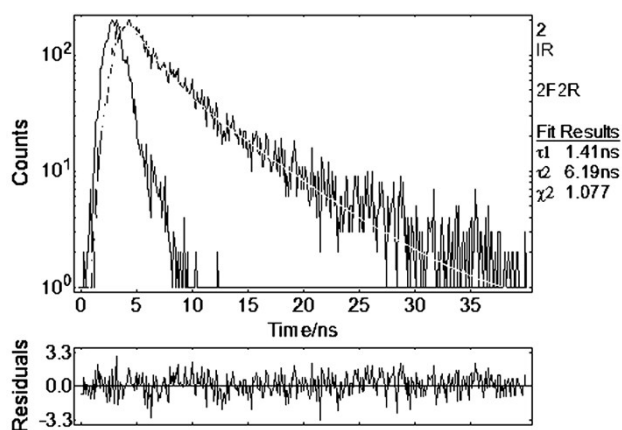

(b) The fluorescence lifetime decay curve of BER-ctDNA

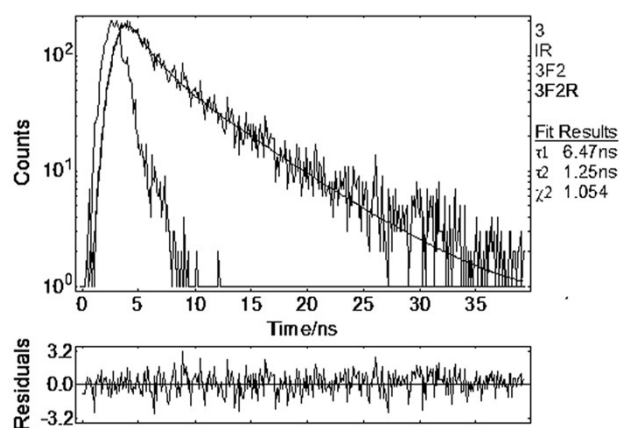

(c) The fluorescence lifetime decay curve of AgNPs-BER-ctDNA

Fig. S5 The fluorescence lifetime decay curves of the system. Conditions: AgNPs:  $3.2 \times 10^{-6}$  g mL<sup>-1</sup>; BER:  $8.0 \times 10^{-5}$  mol L<sup>-1</sup>; ctDNA:  $1.0 \times 10^{-5}$  g mL<sup>-1</sup>.
